# Supplementary material
Source: PubMed Central journal article supplement (PMC3503206)
Supplement: 1213797109_pnas.201213797SI.pdf [file 1213797109_pnas.201213797SI.pdf]

# Supporting Information

Sadik et al. 10.1073/pnas.1213797109

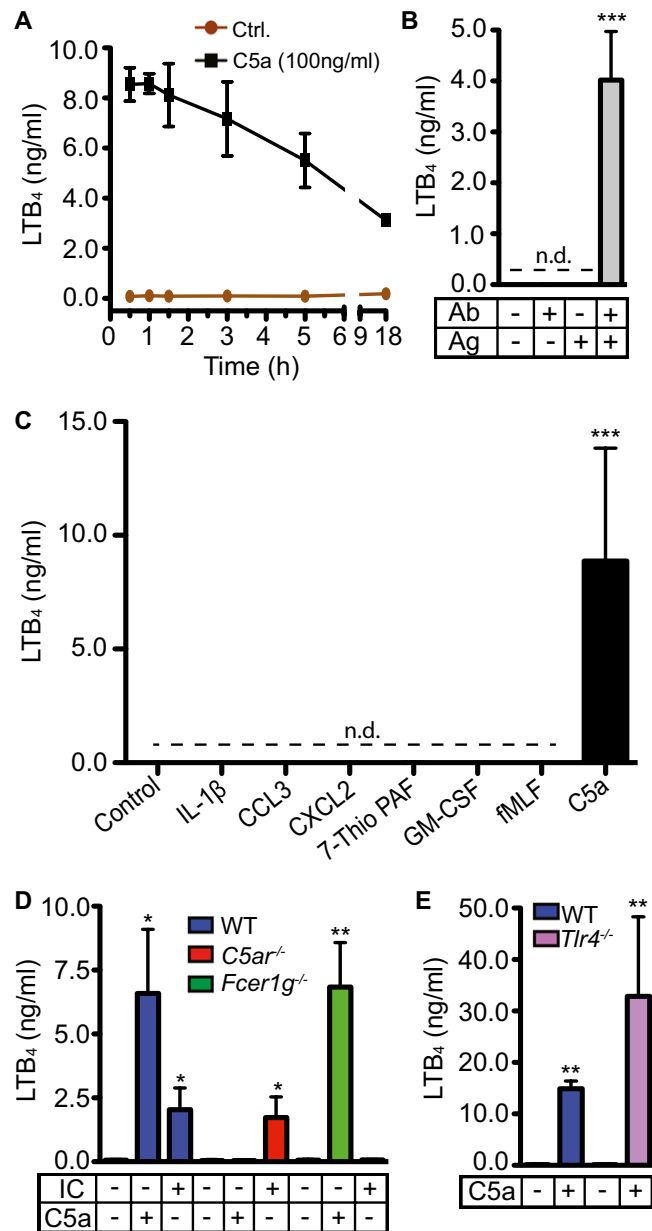

**Fig. S1.** Induction of leukotriene B<sub>4</sub> (LTB<sub>4</sub>) release from resting PMNs in vitro. (A) Kinetic analysis of the release of LTB<sub>4</sub> from polymorphonuclear leukocytes (PMNs) after stimulation with recombinant murine C5a (100 ng/mL) or when left unstimulated as a control. (B) Release of LTB<sub>4</sub> from PMNs after stimulation with Ab, Ag, or Ab plus Ag [immune complex (IC)] for 1 h. (C) Release of LTB<sub>4</sub> from PMNs after stimulation with IL-1 $\beta$  (10 ng/mL), CCL3 (100 ng/mL), CXCL2 (100 ng/mL), 7-thio-PAF (1 nM), GM-CSF (100 ng/mL), fMLF (100 nM), or C5a (100 ng/mL) for 1 h. (D) Release of LTB<sub>4</sub> from WT, C5ar<sup>-/-</sup>, and Fc $\epsilon$ r1g<sup>-/-</sup> PMNs after stimulation with C5a (100 ng/mL) or ICs for 18 h. (E) Release of LTB<sub>4</sub> from WT and Tlr4<sup>-/-</sup> PMNs after stimulation with C5a (100 ng/mL) for 1 h. All data represent concentrations in the supernatant determined by ELISA, shown as mean  $\pm$  SD ( $n = 3$  independent experiments). \* $P < 0.05$ , \*\* $P < 0.01$ , \*\*\* $P < 0.001$  compared with unstimulated control. n.d., not detectable.







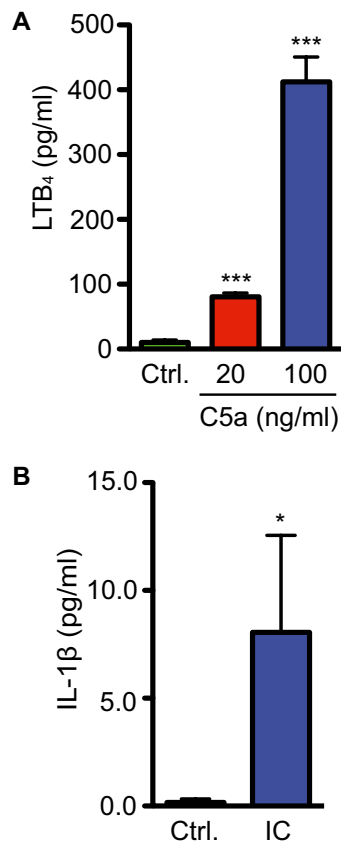

**Fig. 56.** C5a and ICs induce the release of LTB<sub>4</sub> and IL-1β, respectively, from human peripheral PMNs. Human PMNs were freshly isolated using dextrane and Ficoll from heparinized peripheral blood of healthy donors and resuspended to a cell concentration of  $5 \times 10^6$ /mL in RPMI, 1% human serum, 10 mM HEPES. (A) PMNs were seeded into round-bottom polypropylene tubes. Cells were left as unstimulated controls or stimulated with 20 or 100 ng/mL human recombinant C5a, as indicated, for 1 h. Afterward, cell-free supernatants were harvested and LTB<sub>4</sub> contents assayed by ELISA ( $n = 6$  blood donors compiled from two independent experiments). (B) PMNs were prestimulated with 50 ng/mL GM-CSF for 30 min. Afterward, PMNs were either left unstimulated or stimulated with immobilized ICs, as described in *Methods*. After 20 h cell-free supernatants were harvested and IL-1β was determined by ELISA ( $n = 7$  blood donors compiled from two independent experiments). All data are presented as mean  $\pm$  SEM. \* $P < 0.05$ , \*\*\* $P < 0.001$  for indicated group vs. control.



### Generation of bone marrow chimera

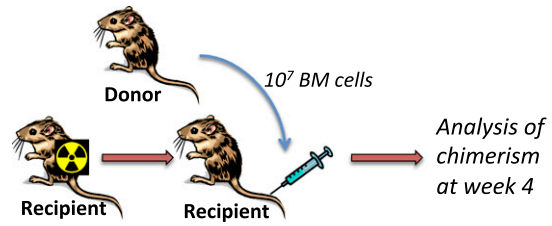

### Generation of mixed bone marrow chimera

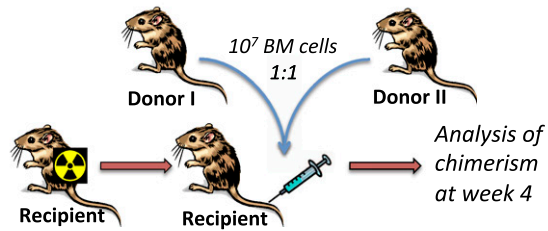

Fig. S8. Schematic of the generation of bone marrow chimeric mice.
